# Supplementary material
Source: PubMed Central journal article supplement (PMC6094055)
Supplement: MCB.00603-17_zmb999101818s1.pdf [file MCB.00603-17_zmb999101818s1.pdf]

## Fleenor, C.J., et al. Supplemental Material

**Table S1. BioID ZFP521 interactors**

| <i>PXIs</i>       |                  | <i>NLS-BirA*</i>            | <i>Zfp521-BirA*</i>         |                   |                          | <i>SAINT value</i> |                 |
|-------------------|------------------|-----------------------------|-----------------------------|-------------------|--------------------------|--------------------|-----------------|
| <i>Protein ID</i> | <i>Gene Name</i> | <i>Normalized MS (/50K)</i> | <i>Normalized MS (/50K)</i> |                   | <i>Fold-change (lin)</i> | <i>Zfp521.2</i>    | <i>Zfp521.3</i> |
|                   |                  |                             | <i>Lin scale</i>            | <i>log2 scale</i> |                          |                    |                 |
| B1AR17            | Chd3             | 0.0                         | 142.5                       | 7.2               | 475.0                    | 1.00               | 1.00            |
| B2RY56            | Rbm25            | 0.0                         | 4.0                         | 2.0               | 13.3                     | 0.96               | 0.88            |
| D3YW4M4           |                  | 0.0                         | 283.0                       | 8.1               | 943.3                    | 1.00               | 1.00            |
| E0CYV9            | LOC102634333     | 0.0                         | 11.0                        | 3.5               | 36.7                     | 1.00               | 1.00            |
| E0CZF0            |                  | 0.0                         | 7.5                         | 2.9               | 25.0                     | 0.99               | 0.99            |
| F8WHY8            | Mta1             | 52.1                        | 405.5                       | 8.7               | 7.8                      | 1.00               | 1.00            |
| O08808            | Diap1            | 0.0                         | 16.0                        | 4.0               | 53.3                     | 1.00               | 1.00            |
| O35618-2          | Mdm4             | 0.0                         | 7.5                         | 2.9               | 25.0                     | 0.98               | 1.00            |
| O54946-2          | Dnajb6           | 0.0                         | 17.0                        | 4.1               | 56.7                     | 1.00               | 1.00            |
| O54988-2          | Slk              | 0.0                         | 18.5                        | 4.2               | 61.7                     | 1.00               | 1.00            |
| O55029            | Copb2            | 3.5                         | 19.0                        | 4.2               | 5.5                      | 1.00               | 0.98            |
| O55131            | Sept7            | 0.0                         | 5.0                         | 2.3               | 16.7                     | 0.96               | 0.98            |
| O89053            | Coro1a           | 0.0                         | 25.0                        | 4.6               | 83.3                     | 1.00               | 1.00            |
| P08730-2          | Krt13            | 0.0                         | 34.5                        | 5.1               | 115.0                    | 1.00               | 1.00            |
| P26638            | Sars             | 0.0                         | 4.5                         | 2.2               | 15.0                     | 0.88               | 0.88            |
| P27870            | Vav1             | 0.0                         | 4.5                         | 2.2               | 15.0                     | 0.98               | 0.86            |
| P28740-1          | Kif2a            | 1.2                         | 9.0                         | 3.2               | 7.8                      | 1.00               | 0.85            |
| P33609            | Pola1            | 2.3                         | 14.5                        | 3.9               | 6.3                      | 0.98               | 0.94            |
| P40124            | Cap1             | 0.0                         | 6.5                         | 2.7               | 21.7                     | 1.00               | 0.86            |
| P42669            | Pura             | 0.0                         | 10.0                        | 3.3               | 33.3                     | 1.00               | 1.00            |
| P48025            | Syk              | 0.0                         | 5.5                         | 2.5               | 18.3                     | 0.96               | 0.98            |
| P51125-2          | Cast             | 0.0                         | 9.0                         | 3.2               | 30.0                     | 0.98               | 0.98            |
| P53564-3          | Cux1             | 0.0                         | 31.0                        | 5.0               | 103.3                    | 1.00               | 1.00            |
| P56959            | Fus              | 198.1                       | 651.5                       | 9.3               | 3.3                      | 1.00               | 1.00            |
| P61211            | Arl1             | 0.0                         | 15.0                        | 3.9               | 50.0                     | 1.00               | 1.00            |
| P61750            | Arf4             | 0.0                         | 35.5                        | 5.1               | 118.3                    | 1.00               | 1.00            |
| P62315            | Snrpd1           | 3.5                         | 25.5                        | 4.7               | 7.3                      | 0.96               | 0.94            |
| P63038            | Hspd1            | 3.5                         | 34.0                        | 5.1               | 9.8                      | 0.98               | 1.00            |
| P63094-2          | Gnas             | 0.0                         | 14.5                        | 3.9               | 48.3                     | 1.00               | 0.98            |
| P81183-2          | Ikzf2            | 7.0                         | 27.5                        | 4.8               | 4.0                      | 0.90               | 0.90            |
| P97496-2          | Smarcc1          | 0.0                         | 8.5                         | 3.1               | 28.3                     | 1.00               | 0.98            |
| P97807-2          | Fh               | 0.0                         | 7.5                         | 2.9               | 25.0                     | 1.00               | 0.98            |
| Q1W617-2          | Shroom4          | 0.0                         | 8.0                         | 3.0               | 26.7                     | 0.99               | 0.98            |
| Q3THE2            | Myl12b           | 0.0                         | 5.0                         | 2.3               | 16.7                     | 0.98               | 0.98            |
| Q3TV65            | Mpnd             | 0.0                         | 4.5                         | 2.2               | 15.0                     | 0.98               | 0.86            |
| Q3TWW0            |                  | 0.0                         | 161.5                       | 7.3               | 538.3                    | 1.00               | 1.00            |
| Q3U515            | Vwce             | 0.0                         | 8.5                         | 3.1               | 28.3                     | 1.00               | 0.98            |

|          |         |      |       |     |        |      |      |
|----------|---------|------|-------|-----|--------|------|------|
| Q3UDY0   |         | 0.0  | 6.0   | 2.6 | 20.0   | 0.98 | 0.96 |
| Q3UND0   | Skap2   | 1.2  | 7.5   | 2.9 | 6.5    | 0.98 | 0.85 |
| Q3UV17   | Krt76   | 1.2  | 11.5  | 3.5 | 9.9    | 1.00 | 0.96 |
| Q60973   | Rbbp7   | 38.2 | 87.0  | 6.4 | 2.3    | 0.93 | 1.00 |
| Q61818-2 | Rai1    | 2.3  | 16.0  | 4.0 | 6.9    | 0.98 | 0.99 |
| Q62167   | Ddx3x   | 0.0  | 93.0  | 6.5 | 310.0  | 1.00 | 1.00 |
| Q6KAS7   | Znf521  | 0.0  | 417.0 | 8.7 | 1390.0 | 1.00 | 1.00 |
| Q6NVF9   | Cpsf6   | 15.1 | 49.5  | 5.6 | 3.3    | 0.97 | 1.00 |
| Q6P1D7   | Slx4    | 1.2  | 23.0  | 4.5 | 19.9   | 1.00 | 1.00 |
| Q6Y7W8-2 | Gigyf2  | 0.0  | 3.0   | 1.6 | 10.0   | 0.86 | 0.86 |
| Q7TMX5-2 | Shq1    | 0.0  | 8.0   | 3.0 | 26.7   | 1.00 | 0.88 |
| Q80U93   | Nup214  | 0.0  | 8.0   | 3.0 | 26.7   | 0.98 | 0.98 |
| Q80WJ7   | Mtdh    | 1.2  | 21.0  | 4.4 | 18.1   | 1.00 | 0.98 |
| Q8BGD9   | Eif4b   | 24.3 | 65.0  | 6.0 | 2.7    | 1.00 | 0.96 |
| Q8BJW6-2 | Eif2a   | 3.5  | 17.0  | 4.1 | 4.9    | 0.86 | 0.98 |
| Q8BVE3   | Atp6v1h | 0.0  | 7.5   | 2.9 | 25.0   | 1.00 | 0.98 |
| Q8C3J5   | Dock2   | 0.0  | 16.0  | 4.0 | 53.3   | 1.00 | 0.88 |
| Q8C5Z3   | Ssxb2   | 0.0  | 9.0   | 3.2 | 30.0   | 1.00 | 1.00 |
| Q8CFV9   | Rfk     | 0.0  | 5.5   | 2.5 | 18.3   | 0.98 | 0.98 |
| Q8CG47   | Smc4    | 0.0  | 3.5   | 1.8 | 11.7   | 0.86 | 0.88 |
| Q8CGK3   | Lonp1   | 0.0  | 21.0  | 4.4 | 70.0   | 1.00 | 1.00 |
| Q8CH09   | Sugp2   | 0.0  | 8.5   | 3.1 | 28.3   | 1.00 | 1.00 |
| Q8CHK3   | Mboat7  | 3.5  | 17.5  | 4.1 | 5.0    | 0.95 | 0.93 |
| Q8CHY6   | Gatad2a | 15.1 | 118.0 | 6.9 | 7.8    | 1.00 | 1.00 |
| Q8K0U4   | Hspa12a | 0.0  | 22.5  | 4.5 | 75.0   | 1.00 | 1.00 |
| Q8K212   | Pacs1   | 0.0  | 7.0   | 2.8 | 23.3   | 1.00 | 0.98 |
| Q8K4L0   | Ddx54   | 0.0  | 28.5  | 4.8 | 95.0   | 1.00 | 1.00 |
| Q8R001-2 | Mapre2  | 0.0  | 10.5  | 3.4 | 35.0   | 1.00 | 1.00 |
| Q8R2R9   | Ap3m2   | 0.0  | 8.5   | 3.1 | 28.3   | 0.98 | 1.00 |
| Q8VHR5   | Gatad2b | 25.5 | 145.0 | 7.2 | 5.7    | 1.00 | 1.00 |
| Q91VR5   | Ddx1    | 0.0  | 12.0  | 3.6 | 40.0   | 1.00 | 1.00 |
| Q91WL8-2 | Wwox    | 0.0  | 9.0   | 3.2 | 30.0   | 0.99 | 1.00 |
| Q91YY4   | Atpaf2  | 0.0  | 4.0   | 2.0 | 13.3   | 0.86 | 0.88 |
| Q922R8   | Pdia6   | 3.5  | 16.5  | 4.0 | 4.7    | 0.93 | 0.81 |
| Q924K8-2 | Mta3    | 0.0  | 41.0  | 5.4 | 136.7  | 1.00 | 1.00 |
| Q925J9-4 | Med1    | 8.1  | 36.0  | 5.2 | 4.4    | 0.96 | 1.00 |
| Q99J99   | Mpst    | 0.0  | 16.0  | 4.0 | 53.3   | 1.00 | 1.00 |
| Q99JX4   | Eif3m   | 0.0  | 6.0   | 2.6 | 20.0   | 1.00 | 0.96 |
| Q99JY0   | Hadhb   | 0.0  | 17.5  | 4.1 | 58.3   | 1.00 | 1.00 |
| Q99LC5   | Etfa    | 0.0  | 9.5   | 3.2 | 31.7   | 1.00 | 0.88 |
| Q99N69   | Lpxn    | 0.0  | 8.5   | 3.1 | 28.3   | 0.99 | 1.00 |
| Q99PU7   | Bap1    | 0.0  | 6.5   | 2.7 | 21.7   | 0.98 | 0.96 |
| Q9CQN1   | Trap1   | 0.0  | 18.0  | 4.2 | 60.0   | 1.00 | 1.00 |
| Q9CWH6   | Psm8    | 0.0  | 8.5   | 3.1 | 28.3   | 1.00 | 0.98 |
| Q9CZX8   | Rps19   | 4.6  | 34.0  | 5.1 | 7.3    | 1.00 | 1.00 |
| Q9D051   | Pdhb    | 1.2  | 12.5  | 3.6 | 10.8   | 0.98 | 0.87 |
| Q9D0K2   | Oxct1   | 0.0  | 4.5   | 2.2 | 15.0   | 0.98 | 0.88 |
| Q9D7S7-2 | Rpl22l1 | 0.0  | 7.5   | 2.9 | 25.0   | 0.98 | 0.99 |
| Q9D7S9   | Chmp5   | 0.0  | 21.5  | 4.4 | 71.7   | 1.00 | 1.00 |
| Q9DC69   | Ndufa9  | 0.0  | 5.0   | 2.3 | 16.7   | 0.98 | 0.86 |
| Q9EPJ9-2 | Arfgap1 | 0.0  | 6.5   | 2.7 | 21.7   | 0.99 | 0.98 |

|          |          |       |       |     |       |      |      |
|----------|----------|-------|-------|-----|-------|------|------|
| Q9EPQ8-2 | Tcf20    | 0.0   | 20.5  | 4.4 | 68.3  | 1.00 | 1.00 |
| Q9ERU9   | Ranbp2   | 2.3   | 15.5  | 4.0 | 6.7   | 0.95 | 0.93 |
| Q9JHK5   | Plek     | 0.0   | 13.0  | 3.7 | 43.3  | 1.00 | 0.98 |
| Q9JK30-2 | Orc3     | 0.0   | 7.0   | 2.8 | 23.3  | 0.88 | 0.88 |
| Q9JK91   | Mlh1     | 0.0   | 6.5   | 2.7 | 21.7  | 1.00 | 0.86 |
| Q9JLL3   | Tnfrsf19 | 0.0   | 30.0  | 4.9 | 100.0 | 1.00 | 1.00 |
| Q9QUI0   | Rhoa     | 0.0   | 16.0  | 4.0 | 53.3  | 0.98 | 1.00 |
| Q9QXB9   | Drg2     | 0.0   | 6.0   | 2.6 | 20.0  | 0.98 | 0.98 |
| Q9QZ82   | Cyp11a1  | 1.2   | 12.0  | 3.6 | 10.4  | 1.00 | 0.87 |
| Q9R190   | Mta2     | 62.6  | 211.5 | 7.7 | 3.4   | 1.00 | 1.00 |
| Q9WTI7-2 | Myo1c    | 0.0   | 11.5  | 3.5 | 38.3  | 1.00 | 0.98 |
| Q9WUM4   | Coro1c   | 7.0   | 75.5  | 6.2 | 10.9  | 1.00 | 1.00 |
| Q9WVL6   | Extl3    | 2.3   | 14.0  | 3.8 | 6.0   | 0.95 | 0.95 |
| Q9Z110-2 | Aldh18a1 | 0.0   | 44.5  | 5.5 | 148.3 | 1.00 | 1.00 |
| Q9Z1T2   | Thbs4    | 216.7 | 839.0 | 9.7 | 3.9   | 1.00 | 1.00 |
| Q9Z2D8-2 | Mbd3     | 15.1  | 91.0  | 6.5 | 6.0   | 1.00 | 1.00 |
| Q9Z2E1   | Mbd2     | 5.8   | 27.0  | 4.8 | 4.7   | 0.90 | 0.97 |

**Table S2. Antibodies**

| <b>Antibody</b> | <b>Clone</b> | <b>COMPANY</b> |
|-----------------|--------------|----------------|
| ckit            | 2B8          | eBioscience    |
| Sca1 FITC       | D7           | eBioscience    |
| CD34            | RAM34        | eBioscience    |
| CD135           | A2F10        | eBioscience    |
| B220            | RA3-6B2      | eBioscience    |
| CD3e            | 145-2C11     | BD Biosciences |
| Ter119          | TER119       | BD Biosciences |
| CD43            | S7           | BD Biosciences |
| BP1             | 6C3          | eBioscience    |
| CD19 ef450      | eBio1D3      | eBioscience    |
| NK1.1           | PK136        | eBioscience    |
| ly6C            | HK1.4        | eBioscience    |
| CD317           | eBio927      | eBioscience    |
| CD11b           | M1/70        | eBioscience    |
| GR1             | RB6-8C5      | eBioscience    |
| CD8             | 53-6.7       | eBioscience    |
| CD4 EF450       | GK1.5        | eBioscience    |
| CD25 PECY7      | PC61.5       | eBioscience    |
| CD44 FITC       | 1M7          | BioLegend      |
| CD3 APCCY7      | 145-2C11     | BD Biosciences |
| IL7RA           | A7R34        | eBioscience    |
| LY6D            | 49-H4        | BD Biosciences |
| CD11c           | N418         | eBioscience    |
| CD19            | 1D3          | BD Biosciences |
| CD45.2          | 104          | BD Biosciences |
| CD45.1          | A20          | eBioscience    |
| IgM             | 11-26C.2a    | BioLegend      |
| IgD             | R6-60.2      | BD Biosciences |
